1 **Original Article**

2 **Title:** Industry and workplace characteristics associated with the use of a COVID-19  
3 contact tracing app in Japan: a nation-wide employee survey

4

5 Tomohiro Ishimaru<sup>1</sup>, Koki Ibayashi<sup>1</sup>, Masako Nagata<sup>2</sup>, Ayako Hino<sup>3</sup>, Seiichiro Tateishi<sup>4</sup>,  
6 Mayumi Tsuji<sup>5</sup>, Akira Ogami<sup>6</sup>, Shinya Matsuda<sup>7</sup>, Yoshihisa Fujino<sup>1</sup> for the  
7 CORoNaWork Project

8

9 **Author contributions:** Y.F. was the chairperson of the study group. T.I. conceived  
10 the research questions. All the authors designed the research protocol and developed  
11 the questionnaire. T.I. conducted the statistical analysis with Y.F.. T.I. drafted the  
12 initial manuscript. All the authors revised and approved the final manuscript.

13

14 **Authors' affiliations:**

15 <sup>1</sup>Department of Environmental Epidemiology, Institute of Industrial Ecological  
16 Sciences, University of Occupational and Environmental Health, Japan, Kitakyushu,  
17 Japan

18 <sup>2</sup>Department of Occupational Health Practice and Management, Institute of Industrial  
19 Ecological Sciences, University of Occupational and Environmental Health, Japan,  
20 Kitakyushu, Japan

21 <sup>3</sup>Department of Mental Health, Institute of Industrial Ecological Sciences, University of  
22 Occupational and Environmental Health, Japan, Kitakyushu, Japan

23 <sup>4</sup>Department of Occupational Medicine, School of Medicine, University of  
24 Occupational and Environmental Health, Japan, Kitakyushu, Japan

25 <sup>5</sup>Department of Environmental Health, School of Medicine, University of Occupational

26 and Environmental Health, Japan, Kitakyushu, Japan

27 <sup>6</sup>Department of Work Systems and Health, Institute of Industrial Ecological Sciences,

28 University of Occupational and Environmental Health, Japan, Kitakyushu, Japan

29 <sup>7</sup>Department of Preventive Medicine and Community Health, School of Medicine,

30 University of Occupational and Environmental Health, Japan, Kitakyushu, Japan

31

32 **Corresponding author:**

33 Tomohiro Ishimaru, MD, MPH, PhD

34 Department of Environmental Epidemiology, Institute of Industrial Ecological Sciences,

35 University of Occupational and Environmental Health, 1-1 Iseigaoka, Yahata-nishi-ku,

36 Kitakyushu, Fukuoka 807-8555, Japan

37 Tel: +81-93-603-1611, Fax: +81-93-601-7324, e-mail: [ishimaru@med.uoeh-u.ac.jp](mailto:ishimaru@med.uoeh-u.ac.jp)

38

39 **Abstract**

40 **Objectives:** To combat coronavirus disease 2019 (COVID-19), many countries have  
41 used contact tracing apps, including Japan's voluntary-use contact-confirming  
42 application (COCOA). The current study aimed to identify industry and workplace  
43 characteristics associated with the use of this COVID-19 contact tracing app.

44 **Methods:** This cross-sectional study of full-time workers used an online survey.  
45 Multiple logistic regression analysis was used to evaluate the associations of industry  
46 and workplace characteristics with contact tracing app use.

47 **Results:** Of the 27,036 participants, 25.1% had downloaded the COCOA. Workers in  
48 the public service (adjusted odds ratio [aOR] = 1.29, 95% confidence interval [CI]:  
49 1.14–1.45) and information technology (aOR = 1.38, 95% CI: 1.20–1.58) industries  
50 were more likely to use the app than were those in the manufacturing industry. In  
51 contrast, app usage was less common among workers in the retail and wholesale  
52 (aOR = 0.87, 95% CI: 0.76–0.99) and food/beverage (aOR = 0.81, 95% CI:  
53 0.70–0.94) industries, but further adjustment for business size attenuated these  
54 associations. Workers at larger companies were more likely to use the app.  
55 Compared with permanent employees, the odds of using the app were higher for  
56 managers and civil servants but lower for those who were self-employed.

57 **Conclusions:** One possible reason for the under-implementation of the contact  
58 tracing app in the retail and wholesale and food/beverage industries is small business  
59 size, as suggested by the fully adjusted model results. An awareness campaign  
60 should be conducted to promote the widespread use of the contact tracing app in  
61 these industries.

62

63 **Keywords:** Contact tracing, COVID-19, SARS-CoV-2, smartphone, worksite

64

## 65 **Introduction**

66 A number of countries have used digital contact tracing tools to combat coronavirus  
67 disease 2019 (COVID-19) by tracing possible infected cases to prevent the spread of  
68 the disease.<sup>1, 2</sup> Japan's government released a contact tracing app for  
69 smartphones—the contact-confirming application (COCOA)—on June 19, 2020.<sup>3</sup>  
70 Downloading the COCOA is not mandatory but it is recommended by authorities. As  
71 of March 18, 2021, the COCOA had been downloaded by 20.8% of Japanese citizens  
72 (26 million downloads) and used for 2.5% of positive cases (11,513/452,863).<sup>3</sup> The  
73 COCOA uses Bluetooth to collect information on close contacts—those who have  
74 been within 1 meter of an individual who has installed the app for a duration of at least  
75 15 minutes in the last 14 days. When a user is infected with COVID-19, they can alert  
76 others with whom they have been in close contact through the app. No personal  
77 information is stored in the central database. The notified person can then get tested  
78 at the nearest COVID-19 testing center.

79

80 High utilization is important for contact tracing apps because they are only effective  
81 when both those who are infected with COVID-19 and their close contacts have  
82 installed the app. According to a simulation study, 90% of the population needs to use  
83 the COCOA for effective infection control.<sup>4</sup> In other countries, contact tracing apps,  
84 such as TraceTogether in Singapore, have frequently been used with mandatory  
85 installation and use.<sup>2</sup> In contrast, this practice is less frequent in countries where  
86 smartphones are not widely used.<sup>2</sup> In terms of using contact tracing apps, migrant  
87 workers, persons with low income, and older adults who may find the technology  
88 necessary to use the app difficult are all at a disadvantage.<sup>5</sup> The acceptance rate of

89 contact tracing apps has been found to range from 42% to 70% in developed  
90 countries.<sup>6-8</sup> Several factors influence this acceptance: trust in the government, health  
91 concerns, privacy, battery usage, and concerns about the effectiveness of the app.<sup>7</sup>

92

93 In Japan, employers have promoted the use the COCOA among workers for effective  
94 contact tracing to prevent workplace COVID-19 clusters.<sup>9</sup> Many workers are at risk of  
95 COVID-19 infection because of their close contact with colleagues or customers.  
96 However, there is little evidence about the associations of industry and workplace  
97 characteristics with the use of contact tracing apps. Promoting the use of contact  
98 tracing apps in the workplace is also important for preventing the spread of clusters  
99 from the working-age population to high-risk populations, such as older adults. To  
100 develop a strategy for the widespread use of contact tracing apps, it is necessary to  
101 identify the industries or workplaces in which such apps are under-implemented. The  
102 purpose of the current study was to identify which industry and workplace  
103 characteristics were associated with the use of a COVID-19 contact tracing app.

104

## 105 **Subjects and Methods**

### 106 Study design and participants

107 The current study was conducted as part of the Collaborative Online Research on the  
108 Novel-coronavirus and Work (CORoNaWork) Project. Details of the study protocol  
109 have been published elsewhere.<sup>10</sup> Briefly, the CORoNaWork Project was an online  
110 cohort study in Japan. We extracted online self-administered questionnaire data from  
111 the baseline dataset, collected December 22–26, 2020, for cross-sectional analysis.  
112 Panelists who had registered with an online research company and who were currently  
113 working full-time were invited to participate in the survey. Health care workers and

114 caregivers were not invited to participate. We selected 33,087 participants through  
115 cluster sampling stratified by sex, region, and job type. We excluded invalid responses,  
116 leaving data on 27,036 participants for analysis. When the baseline survey was  
117 conducted, the numbers of COVID-19 infections and deaths were much higher than  
118 they had been during the first and second waves of the disease in Japan; therefore,  
119 Japan was on maximum alert during this third wave. This study was approved by the  
120 Ethics Committee of the University of Occupational and Environmental Health, Japan  
121 (R2-079).

122

### 123 Questionnaire

124 This study used questionnaire data including variables on (a) demographic  
125 characteristics; (b) health behavior; (c) risk perception; (d) industry and workplace  
126 characteristics; and (e) the outcome (use of the contact tracing app). The  
127 demographic variables included sex, age, marital status, education, and annual  
128 household income. The health behavior variables were smoking and regular alcohol  
129 intake. Risk perception was assessed using a single question on anxiety about  
130 contracting COVID-19, with the response options of *yes* and *no*. Three variables were  
131 used to assess industry and workplace characteristics: type of industry, business size,  
132 and occupation. Type of industry followed the Japan Standard Industrial Classification,  
133 with industries accounting for less than 3% of the sample categorized as “other.”<sup>11</sup>  
134 Business size was classified as < 10, 10–49, 50–999, or ≥ 1,000 employees. Each  
135 participant reported their occupation as *permanent employee*, *manager*, *civil servant*,  
136 *dispatched or contract worker*, *self-employed*, or *other*. The outcome variable, the use  
137 of the contact tracing app, was assessed by asking “Have you downloaded the  
138 COCOA?” The response options were *yes* and *no*.

139

## 140 Data analysis

141 Univariate and multiple logistic regression analyses were used to evaluate the  
142 associations of occupational factors with the use of the contact tracing app. We  
143 assessed three occupational factors as explanatory variables: type of industry,  
144 business size, and occupation. Three models were evaluated. Model 1 was the  
145 univariate model. Model 2 was adjusted for demographic, health behavior, and risk  
146 perception variables (sex, age, marital status, education, annual household income,  
147 smoking, alcohol intake, and anxiety about contracting COVID-19). Model 3  
148 additionally adjusted for type of industry and business size. We did not include the  
149 occupation variables in Model 3 because of the high correlations between the  
150 occupation of civil servant and the public service industry and between self-employed  
151 occupation and business size of 1–9 employees. All *P*-values were two-sided, and  
152 statistical significance was set at  $P < 0.05$ . We used Stata/SE 16.1 (StataCorp,  
153 College Station, TX, USA) for all analyses.

154

## 155 Results

156 Table 1 shows the general characteristics of the study participants. Of the 27,036  
157 participants, 6,786 (25.1%) reported having downloaded the COCOA. Approximately  
158 half of the participants were women (48.9%), and about half were married (55.6%).  
159 The most frequently observed category for annual household income was 4–8 million  
160 JPY (44.1%; USD 1 = JPY 106.78 as of 2020).<sup>12</sup> Excluding the “other” industry  
161 category, manufacturing accounted for the largest percentage of the sample (17.0%),  
162 followed by medical and welfare (16.6%) and public service (7.0%). Establishments  
163 with 50–999 employees (35.9%) and permanent employee (46.5%) were the most

164 frequently observed business size and occupation categories, respectively.

165

166 Table 2 shows the associations of industry and workplace characteristics with the use  
167 of the COVID-19 contact tracing app. Participants in the public service (adjusted odds  
168 ratio [aOR] = 1.29, 95% confidence interval [CI]: 1.14–1.45, Model 3) and information  
169 technology (aOR = 1.38, 95% CI: 1.20–1.58, Model 3) industries were more likely to  
170 use the app than were those in the manufacturing industry. In contrast, app usage  
171 was less common among participants working in the retail and wholesale and  
172 food/beverage industries, and adjusting for demographic, health behavior, and risk  
173 perception variables did not alter these associations remarkably (retail and wholesale:  
174 aOR = 0.87, 95% CI: 0.76–0.99; food/beverage: aOR = 0.81, 95% CI: 0.70–0.94;  
175 Model 2); however, after further adjustment for business size in Model 3, these  
176 industry types showed no significant difference from the manufacturing industry.

177

178 Participants in larger companies were more likely to use the app (50–999 employees:  
179 aOR = 1.21, 95% CI: 1.12–1.32;  $\geq 1,000$  employees: aOR = 1.37, 95% CI: 1.24–1.52;  
180 Model 3). Regarding occupation, compared with permanent employees, the odds of  
181 app usage were higher for managers (aOR = 1.40, 95% CI: 1.28–1.53, Model 2) and  
182 civil servants (aOR = 1.22, 95% CI: 1.11–1.34, Model 2) but lower for those who were  
183 self-employed (aOR = 0.76; 95% CI: 0.69–0.85, Model 2).

184

## 185 **Discussion**

186 The current study identified that working in the public service sector, in the information  
187 technology industry, or for a business with 50 or more employees, as well as holding  
188 the position of manager or civil servant, were factors facilitating the use of the contact



189 tracing app—over 30% of each of these groups had downloaded the app. In contrast,  
190 working in the retail and wholesale and food/beverage industries and being  
191 self-employed were associated with a lower likelihood of using the app—around 20%  
192 of these groups had downloaded the app. These findings give insight needed for the  
193 development of a strategy for the widespread use of COVID-19 contact tracing apps.

194

195 An important finding of this study was that the contact tracing app was  
196 under-implemented in the retail and wholesale and food/beverage industries. This  
197 finding did not change substantially after adjusting for demographic, health behavior,  
198 and risk perception variables. However, further adjustment for business size  
199 attenuated these associations. One possible reason for this change in results is that  
200 most workplaces in these types of industries are small-scale, which may be the cause  
201 of insufficient use of the app. This idea is consistent with a previous study showing  
202 that small companies were relatively unlikely to implement workplace measures  
203 against COVID-19.<sup>13</sup> This may be because of the limited opportunities to obtain  
204 information and the lack of human, time, and financial resources to take  
205 countermeasures against health threats at small companies.<sup>14</sup> However, workers in  
206 these industries have particularly a strong need to use the contact tracing app  
207 because they are in contact with an unspecified number of people, such as in  
208 restaurants and bars, where customers eat and drink without masks.<sup>15</sup> An awareness  
209 campaign should be conducted for the retail and wholesale and food/beverage  
210 industries to promote the use of the contact tracing app.<sup>16</sup>

211

212 We found that the contact tracing app was frequently used by civil servants and  
213 managers. This finding implies that civil servants and managers might follow requests

214 to use the app made through organized channels because workers were encouraged  
215 to use the COCOA by the government and by employer associations.<sup>9</sup> A previous  
216 study conducted in Japan reported that the public service sector most frequently  
217 received announcements regarding measures to prevent COVID-19 in the early stage  
218 of the pandemic<sup>17</sup>—this also suggests that the public service sector provides  
219 COVID-19 advisory information to civil servants. These results indicate that app  
220 uptake may increase when workers, including managers, receive messages through  
221 organized channels, even if the requests are voluntary. For non-managers, a sharing  
222 function allowing users to invite coworkers and friends to download the app may  
223 increase the rate of installation of the app.<sup>7</sup>

224

225 Workers in the information technology industry, such as system engineers, have the  
226 advantage of expertise in digital technology and know how to use smartphone apps.  
227 The current study revealed that information technology industry workers used the  
228 contact tracing app more frequently, compared with workers in other industries. This  
229 finding is in line with a previous study showing that high information technology  
230 literacy eliminated technical obstacles to using contact tracing apps.<sup>18</sup> In addition, the  
231 information technology industry actively implements workplace measures against  
232 COVID-19, such as teleworking, and these practices may also relate to the finding.<sup>17</sup>  
233 These results suggest that a technical support service for those who have difficulty  
234 using the contact tracing app may improve app uptake.

235

236 This study has several limitations. First, the study recruited panelists who registered  
237 with an online research company. Therefore, the participants may not represent  
238 general workers. For example, online panelists may be particularly willing to use

239 online tools or more familiar than others with using apps. Consequently, the results  
240 may underestimate negative factors for use of the app. Second, we evaluated the use  
241 of the contact tracing app by asking participants about whether they had downloaded  
242 it. Therefore, we did not confirm whether the application was installed. However, we  
243 think that most people who downloaded the app also installed it. Despite these  
244 limitations, to the best of our knowledge, this study represents the first study in Japan  
245 to examine current use of the COCOA with a large sample.

246

247 In conclusion, the present study evaluated the associations of industry and workplace  
248 characteristics with the use of a COVID-19 contact tracing app in a large-scale online  
249 survey of Japanese workers. Those working in the public service sector or in  
250 information technology, as well as managers, were frequently found to use the contact  
251 tracing app, whereas those working in the retail and wholesale and food/beverage  
252 industries were less likely to use it. One possible reason for the under-implementation  
253 of the contact tracing app in the retail and wholesale and food/beverage industries  
254 may be the small size of businesses in these types of industries. An awareness  
255 campaign should be conducted for workers in these industries to promote the  
256 widespread use of the contact tracing app to help these workers trace possible  
257 infected cases, preventing the spread of the disease.

258

## 259 **Acknowledgments**

260 This study was supported by a research fund from the University of Occupational and  
261 Environmental Health, Japan; General Incorporated Foundation (Anshin Zaidan): The  
262 Development of Educational Materials on Mental Health Measures for Managers at  
263 Small-sized Enterprises; Health, Labour and Welfare Sciences Research Grants:

264 Comprehensive Research for Women's Healthcare (H30-josei-ippan-002); Research  
265 for the Establishment of an Occupational Health System in Times of Disaster  
266 (H30-roudou-ippan-007), and scholarship donations from Chugai Pharmaceutical Co.,  
267 Ltd.

268

269 The current members of the CORoNaWork Project, in alphabetical order, are as  
270 follows: Dr. Yoshihisa Fujino (present chairperson of the study group), Dr. Akira Ogami,  
271 Dr. Arisa Harada, Dr. Ayako Hino, Dr. Chimed-Ochir Odgerel, Dr. Hajime Ando, Dr.  
272 Hisashi Eguchi, Dr. Kazunori Ikegami, Dr. Keiji Muramatsu, Dr. Koji Mori, Dr. Kyoko  
273 Kitagawa, Dr. Masako Nagata, Dr. Mayumi Tsuji, Dr. Rie Tanaka, Dr. Ryutaro  
274 Matsugaki, Dr. Seiishiro Tateishi, Dr. Shinya Matsuda, Dr. Tomohiro Ishimaru, Dr.  
275 Tomohisa Nagata, Dr. Yosuke Mafune, and Ms. Ning Liu. All members are affiliated  
276 with the University of Occupational and Environmental Health, Japan.

277

## 278 **Disclosure**

279 *Approval of the research protocol:* This study was approved by the Ethics Committee  
280 of the University of Occupational and Environmental Health, Japan (R2-079).

281 *Informed Consent:* Informed consent was obtained from all participants. *Registry and*

282 *the Registration No. of the study/trial:* N/A. *Animal Studies:* N/A. *Conflict of Interest:*

283 N/A.

284

## 285 **References**

286 1. Salathe M, Althaus C, Anderegg N, *et al.* Early evidence of effectiveness of digital  
287 contact tracing for SARS-CoV-2 in Switzerland. *Swiss Med Wkly*  
288 2020;150:w20457.

- 289 2. Elkhodr M, Mubin O, Iftikhar Z, *et al.* Technology, Privacy, and User Opinions of  
290 COVID-19 Mobile Apps for Contact Tracing: Systematic Search and Content  
291 Analysis. *J Med Internet Res* 2021;23:e23467.
- 292 3. Ministry of Health Labour and Welfare. COVID-19 Contact-Confirming Application.  
293 [https://www.mhlw.go.jp/stf/seisakunitsuite/bunya/cocoa\\_00138.html](https://www.mhlw.go.jp/stf/seisakunitsuite/bunya/cocoa_00138.html). Published  
294 2021. Accessed March 18, 2021.
- 295 4. Nakamoto I, Jiang M, Zhang J, *et al.* Evaluation of the Design and Implementation  
296 of a Peer-To-Peer COVID-19 Contact Tracing Mobile App (COCOA) in Japan.  
297 *JMIR Mhealth Uhealth* 2020;8:e22098.
- 298 5. Anglemyer A, Moore TH, Parker L, *et al.* Digital contact tracing technologies in  
299 epidemics: a rapid review. *Cochrane Database Syst Rev* 2020;8:CD013699.
- 300 6. Lewandowsky S, Dennis S, Perfors A, *et al.* Public acceptance of  
301 privacy-encroaching policies to address the COVID-19 pandemic in the United  
302 Kingdom. *PLoS One* 2021;16:e0245740.
- 303 7. Garrett PM, White JP, Lewandowsky S, *et al.* The acceptability and uptake of  
304 smartphone tracking for COVID-19 in Australia. *PLoS One* 2021;16:e0244827.
- 305 8. Garrett PM, Wang Y, White JP, *et al.* Young Adults View Smartphone Tracking  
306 Technologies for COVID-19 as Acceptable: The Case of Taiwan. *Int J Environ*  
307 *Res Public Health* 2021;18.
- 308 9. Japan Federation of Economic Organizations. The NEW growth strategy.  
309 [https://www.keidanren.or.jp/en/policy/2020/108\\_proposal.html](https://www.keidanren.or.jp/en/policy/2020/108_proposal.html). Published 2020.  
310 Accessed March 18, 2021.
- 311 10. Fujino Y, Ishimaru T, Eguchi H, *et al.* Protocol for a nationwide Internet-based  
312 health survey in workers during the COVID-19 pandemic in 2020. *JUOEH*  
313 2021:in press.

- 314 11. Ministry of Internal Affairs and Communications. Japan Standard Industrial  
315 Classification.  
316 [https://www.soumu.go.jp/toukei\\_toukatsu/index/seido/sangyo/H25index.htm](https://www.soumu.go.jp/toukei_toukatsu/index/seido/sangyo/H25index.htm).  
317 Published 2014. Accessed March 18, 2021.
- 318 12. Organisation for Economic Co-operation and Development. Exchange rates.  
319 [https://data.oecd.org/conversion/exchange-rates.htm?fbclid=IwAR2Bn6JIF8Wf](https://data.oecd.org/conversion/exchange-rates.htm?fbclid=IwAR2Bn6JIF8WfAbVhwDEiKFhG0_rsTu-iLq1PW47o1ujebwc7CWF0e0wUx_A)  
320 [AbVhwDEiKFhG0\\_rsTu-iLq1PW47o1ujebwc7CWF0e0wUx\\_A](https://data.oecd.org/conversion/exchange-rates.htm?fbclid=IwAR2Bn6JIF8WfAbVhwDEiKFhG0_rsTu-iLq1PW47o1ujebwc7CWF0e0wUx_A). Published 2021.  
321 Accessed March 18, 2021.
- 322 13. Ishimaru T, Nagata M, Hino A, *et al*. Workplace measures against COVID-19  
323 during the winter third wave in Japan: company size-based differences.  
324 *medRxiv* 2021:2021.2002.2014.21251716.
- 325 14. Hasle P, Limborg HJ. A review of the literature on preventive occupational health  
326 and safety activities in small enterprises. *Ind Health* 2006;44:6-12.
- 327 15. Kim J, Kim J, Wang Y. Uncertainty risks and strategic reaction of restaurant firms  
328 amid COVID-19: Evidence from China. *Int J Hosp Manag*  
329 2021;92:102752-102752.
- 330 16. Rodriguez P, Grana S, Alvarez-Leon EE, *et al*. A population-based controlled  
331 experiment assessing the epidemiological impact of digital contact tracing. *Nat*  
332 *Commun* 2021;12:587.
- 333 17. Sasaki N, Kuroda R, Tsuno K, Kawakami N. Workplace responses to COVID-19  
334 and their association with company size and industry in an early stage of the  
335 epidemic in Japan. *Environmental and Occupational Health Practice*  
336 2020;2:eohp.2020-0007-OA.
- 337 18. von Wyl V, Hoglinger M, Sieber C, *et al*. Drivers of Acceptance of COVID-19  
338 Proximity Tracing Apps in Switzerland: Panel Survey Analysis. *JMIR Public*

339            *Health Surveill* 2021;7:e25701.

340

341 Table 1. General characteristics of the study participants

|                                          | Total             | COVID-19 contact tracing app users |                      |
|------------------------------------------|-------------------|------------------------------------|----------------------|
|                                          | <i>N</i> = 27,036 | <i>n</i> = 6,786 (25.1%)           |                      |
|                                          | <i>n</i> (%)      | <i>n</i> (%)                       | Utilization rate (%) |
| Sex                                      |                   |                                    |                      |
| Female                                   | 13,222 (48.9)     | 3,181 (46.9)                       | 24.1                 |
| Male                                     | 13,814 (51.1)     | 3,605 (53.1)                       | 26.1                 |
| Age                                      |                   |                                    |                      |
| 20–39 years                              | 6,763 (25.0)      | 1,669 (24.6)                       | 24.7                 |
| 40–49 years                              | 8,011 (29.6)      | 1,886 (27.8)                       | 23.5                 |
| 50–59 years                              | 9,012 (33.4)      | 2,359 (34.8)                       | 26.2                 |
| 60–65 years                              | 3,250 (12.0)      | 872 (12.8)                         | 26.8                 |
| Marital status                           |                   |                                    |                      |
| Single                                   | 9,164 (33.9)      | 1,991 (29.4)                       | 21.7                 |
| Divorced or widowed                      | 2,843 (10.5)      | 722 (10.6)                         | 25.4                 |
| Married                                  | 15,029 (55.6)     | 4,073 (60.0)                       | 27.1                 |
| Education                                |                   |                                    |                      |
| Junior high or high school               | 7,321 (27.1)      | 1,647 (24.3)                       | 22.5                 |
| Vocational school or college             | 6,544 (24.2)      | 1,552 (22.9)                       | 23.7                 |
| University or graduate school            | 13,171 (48.7)     | 3,587 (52.8)                       | 27.2                 |
| Annual household income                  |                   |                                    |                      |
| < 2,000,000 Japanese yen                 | 1,709 (6.3)       | 277 (4.1)                          | 16.2                 |
| 2,000,000–3,999,999 Japanese yen         | 5,548 (20.5)      | 1,188 (17.5)                       | 21.4                 |
| 4,000,000–7,999,999 Japanese yen         | 11,927 (44.1)     | 2,925 (43.1)                       | 24.5                 |
| ≥ 8,000,000 Japanese yen                 | 7,852 (29.1)      | 2,396 (35.3)                       | 30.5                 |
| Current smoking                          | 7,004 (25.9)      | 1,740 (25.6)                       | 24.8                 |
| Regular alcohol intake                   | 11,017 (40.8)     | 2,901 (42.7)                       | 26.3                 |
| Anxiety about contracting COVID-19 (yes) | 20,017 (74.0)     | 5,737 (84.5)                       | 28.7                 |
| Industry                                 |                   |                                    |                      |
| Manufacturing                            | 4,591 (17.0)      | 1,165 (17.2)                       | 25.4                 |
| Public service                           | 1,891 (7.0)       | 614 (9.0)                          | 32.5                 |
| Information technology                   | 1,331 (4.9)       | 429 (6.3)                          | 32.2                 |
| Retail and wholesale                     | 1,797 (6.6)       | 394 (5.8)                          | 21.9                 |
| Food/beverage                            | 1,319 (4.9)       | 269 (4.0)                          | 20.4                 |
| Medical and welfare                      | 4,500 (16.6)      | 1,071 (15.8)                       | 23.8                 |
| Finance                                  | 1,226 (4.5)       | 364 (5.4)                          | 29.7                 |
| Construction                             | 944 (3.5)         | 240 (3.5)                          | 25.4                 |
| Other                                    | 9,437 (34.9)      | 2,240 (33.0)                       | 23.7                 |
| Business size                            |                   |                                    |                      |
| 1–9 employees                            | 6,165 (22.8)      | 1,272 (18.7)                       | 20.6                 |
| 10–49 employees                          | 4,390 (16.2)      | 957 (14.1)                         | 21.8                 |
| 50–999 employees                         | 9,703 (35.9)      | 2,491 (36.7)                       | 25.7                 |
| ≥ 1,000 employees                        | 6,778 (25.1)      | 2,066 (30.4)                       | 30.5                 |
| Occupation                               |                   |                                    |                      |
| Permanent employee                       | 12,575 (46.5)     | 3,006 (44.3)                       | 23.9                 |
| Manager                                  | 3,403 (12.6)      | 1,160 (17.1)                       | 34.1                 |
| Civil servant                            | 2,810 (10.4)      | 840 (12.4)                         | 29.9                 |
| Dispatched or contract worker            | 2,894 (10.7)      | 671 (9.9)                          | 23.2                 |
| Self-employed                            | 2,819 (10.4)      | 525 (7.7)                          | 18.6                 |
| Other                                    | 2,535 (9.4)       | 584 (8.6)                          | 23.0                 |



343 Table 2. Associations between occupational factors and the use of the COVID-19 contact tracing app

|                              | Model 1 |             |         | Model 2 |             |         | Model 3 |             |         |
|------------------------------|---------|-------------|---------|---------|-------------|---------|---------|-------------|---------|
|                              | OR      | (95% CI)    | p value | OR      | (95% CI)    | P-value | OR      | (95% CI)    | P-value |
| <b>Industry</b>              |         |             |         |         |             |         |         |             |         |
| Manufacturing                | 1.00    | -           | -       | 1.00    | -           | -       | 1.00    | -           | -       |
| Public service               | 1.41    | (1.25–1.58) | < 0.001 | 1.32    | (1.17–1.49) | < 0.001 | 1.29    | (1.14–1.45) | < 0.001 |
| Information technology       | 1.39    | (1.21–1.58) | < 0.001 | 1.36    | (1.18–1.55) | < 0.001 | 1.38    | (1.20–1.58) | < 0.001 |
| Retail and wholesale         | 0.83    | (0.73–0.94) | 0.004   | 0.87    | (0.76–0.99) | 0.034   | 0.92    | (0.81–1.05) | 0.223   |
| Food/beverage                | 0.76    | (0.66–0.89) | < 0.001 | 0.81    | (0.70–0.94) | 0.007   | 0.89    | (0.76–1.03) | 0.125   |
| Medical and welfare          | 0.94    | (0.85–1.03) | 0.201   | 0.86    | (0.78–0.94) | 0.004   | 0.91    | (0.82–1.01) | 0.068   |
| Finance                      | 1.26    | (1.09–1.45) | 0.001   | 1.19    | (1.03–1.38) | 0.016   | 1.15    | (0.99–1.32) | 0.061   |
| Construction                 | 1.00    | (0.85–1.18) | 0.999   | 0.98    | (0.84–1.16) | 0.845   | 1.10    | (0.93–1.30) | 0.271   |
| Other                        | 0.92    | (0.84–0.99) | 0.034   | 0.94    | (0.87–1.03) | 0.175   | 1.01    | (0.93–1.10) | 0.807   |
| <b>Business size</b>         |         |             |         |         |             |         |         |             |         |
| 1–9 employees                | 1.00    | -           | -       | 1.00    | -           | -       | 1.00    | -           | -       |
| 10–49 employees              | 1.09    | (0.99–1.20) | 0.063   | 1.04    | (0.94–1.14) | 0.453   | 1.03    | (0.97–1.11) | 0.329   |
| 50–999 employees             | 1.36    | (1.25–1.46) | < 0.001 | 1.24    | (1.14–1.34) | < 0.001 | 1.22    | (1.13–1.33) | < 0.001 |
| ≥ 1,000 employees            | 1.71    | (1.57–1.85) | < 0.001 | 1.52    | (1.39–1.65) | < 0.001 | 1.44    | (1.32–1.57) | < 0.001 |
| <b>Occupation*</b>           |         |             |         |         |             |         |         |             |         |
| Permanent employee           | 1.00    | -           | -       | 1.00    | -           | -       |         |             |         |
| Manager                      | 1.62    | (1.48–1.76) | < 0.001 | 1.40    | (1.28–1.53) | < 0.001 |         |             |         |
| Civil servant                | 1.34    | (1.23–1.47) | < 0.001 | 1.22    | (1.11–1.34) | < 0.001 |         |             |         |
| Dispatched or contact worker | 0.95    | (0.86–1.04) | 0.277   | 1.02    | (0.92–1.12) | 0.769   |         |             |         |
| Self-employed                | 0.72    | (0.64–0.80) | < 0.001 | 0.76    | (0.69–0.85) | < 0.001 |         |             |         |
| Other                        | 0.95    | (0.86–1.05) | 0.290   | 0.89    | (0.80–0.99) | 0.033   |         |             |         |

344 COVID-19: coronavirus disease 2019; OR: odds ratio; CI: confidence interval

345 Model 1: Adjusted for sex and age

346 Model 2: Adjusted for sex, age, income, marital status, education, smoking, alcohol intake, and anxiety about contracting COVID-19

347 Model 3: Adjusted for sex, age, income, marital status, education, smoking, alcohol intake, anxiety about contracting COVID-19, type of industry,  
348 and business size

349 \* The occupation variables were not included in Model 3 because of the high correlations between the occupation of civil servant and the public  
350 service industry and between self-employed occupation and business size of 1–9 employees.
